# Supplementary material for: Direct and indirect effects on molecular mobility in renewable polylactide–poly(propylene adipate) block copolymers as studied via dielectric spectroscopy and calorimetry
Source: Royal Society of Chemistry journal article supplement (doi:10.1039/d2sm00261b), 2022-01-01
Supplement: d2sm00261b1.pdf [file d2sm00261b1.pdf]

# Supplementary Information

for

## **Direct and Indirect Effects on Molecular Mobility in Renewable Polylactide-Poly(propylene adipate) Block Copolymers as Studied by Dielectric Spectroscopy and Calorimetry**

Panagiotis A. Klonos,<sup>a,b,\*</sup> Zoi Terzopoulou,<sup>a</sup> Alexandra Zamboulis,<sup>a</sup> Miguel Ángel  
Valera,<sup>c</sup> Ana Mangas,<sup>c</sup> Apostolos Kyritsis,<sup>b</sup> Polycarpos Pissis,<sup>b</sup>  
and Dimitrios N. Bikiaris<sup>a,\*</sup>

<sup>a</sup> *Department of Chemistry, Laboratory of Polymer Chemistry and Technology, Aristotle University of Thessaloniki, GR-541 24, Thessaloniki, Greece*

<sup>b</sup> *Department of Physics, National Technical University of Athens (NTUA), Zografou Campus, 15780, Athens, Greece*

<sup>c</sup> *AIMPLAS, Asociación de Investigación de Materiales Plásticos Y Conexas, Carrer de Gustave Eiffel, 4, 46980 Valencia, Spain*

<sup>\*</sup> *Corresponding authors: pklonos@central.ntua.gr (P.A.K.); dbic@chem.auth.gr (D.N.B.).*

## Additional Experimental Data

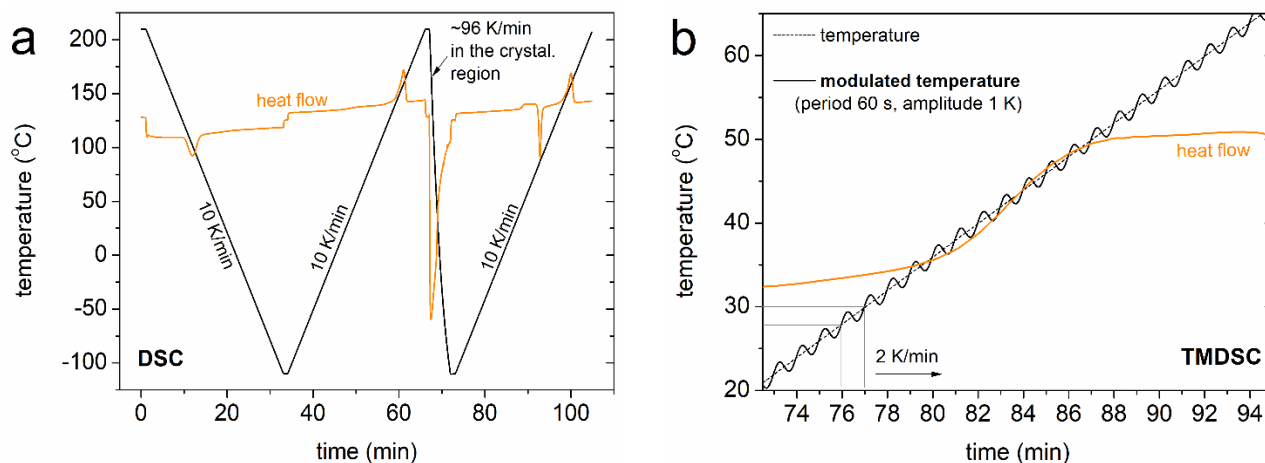

**Figure S1.** Time-temperature profiles during (a) conventional and (b) temperature modulated DSC. For comparison, selected results for the heat flow response have been included.

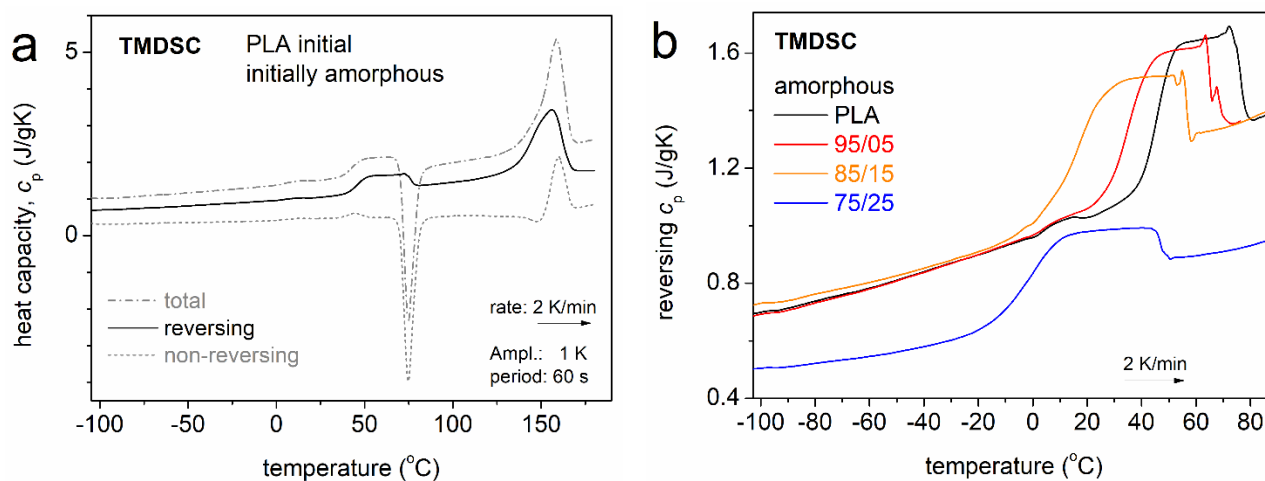

**Figure S2.** (a) Results by TMDSC for initial PLA in terms of total, reversing and non-reversing heat capacity. (b) Comparative curves of the reversing heat capacity term for all samples, focusing on the glass transition temperature range.

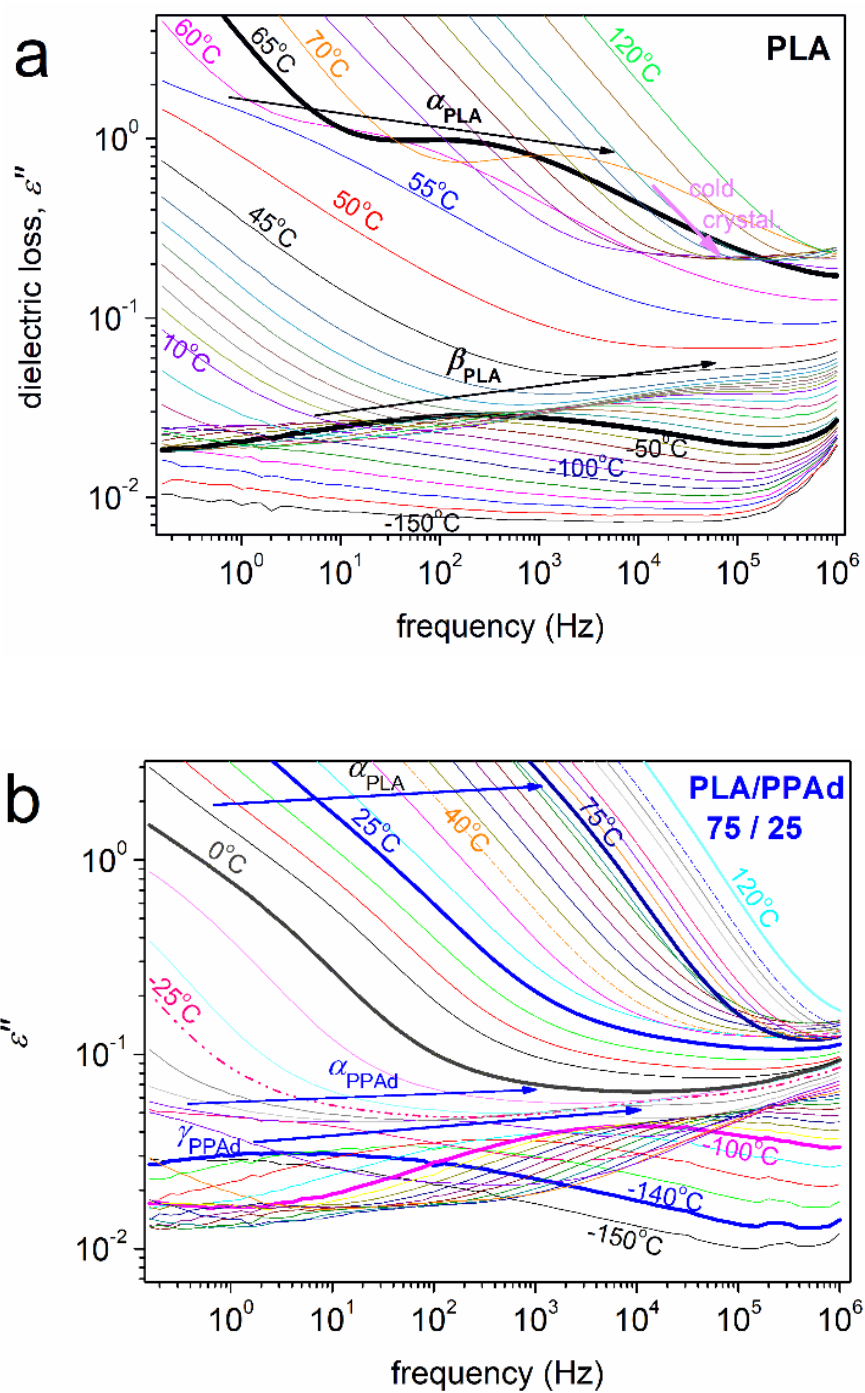

**Figure S3.** Raw BDS data in terms of isothermal curves of  $\epsilon''$  against frequency being shown for (a) initial PLA and (b) the 75/25 copolymer. The corresponding temperatures are indicated for selected isothermal curves, while the main recorded relaxations are arrow-marked.

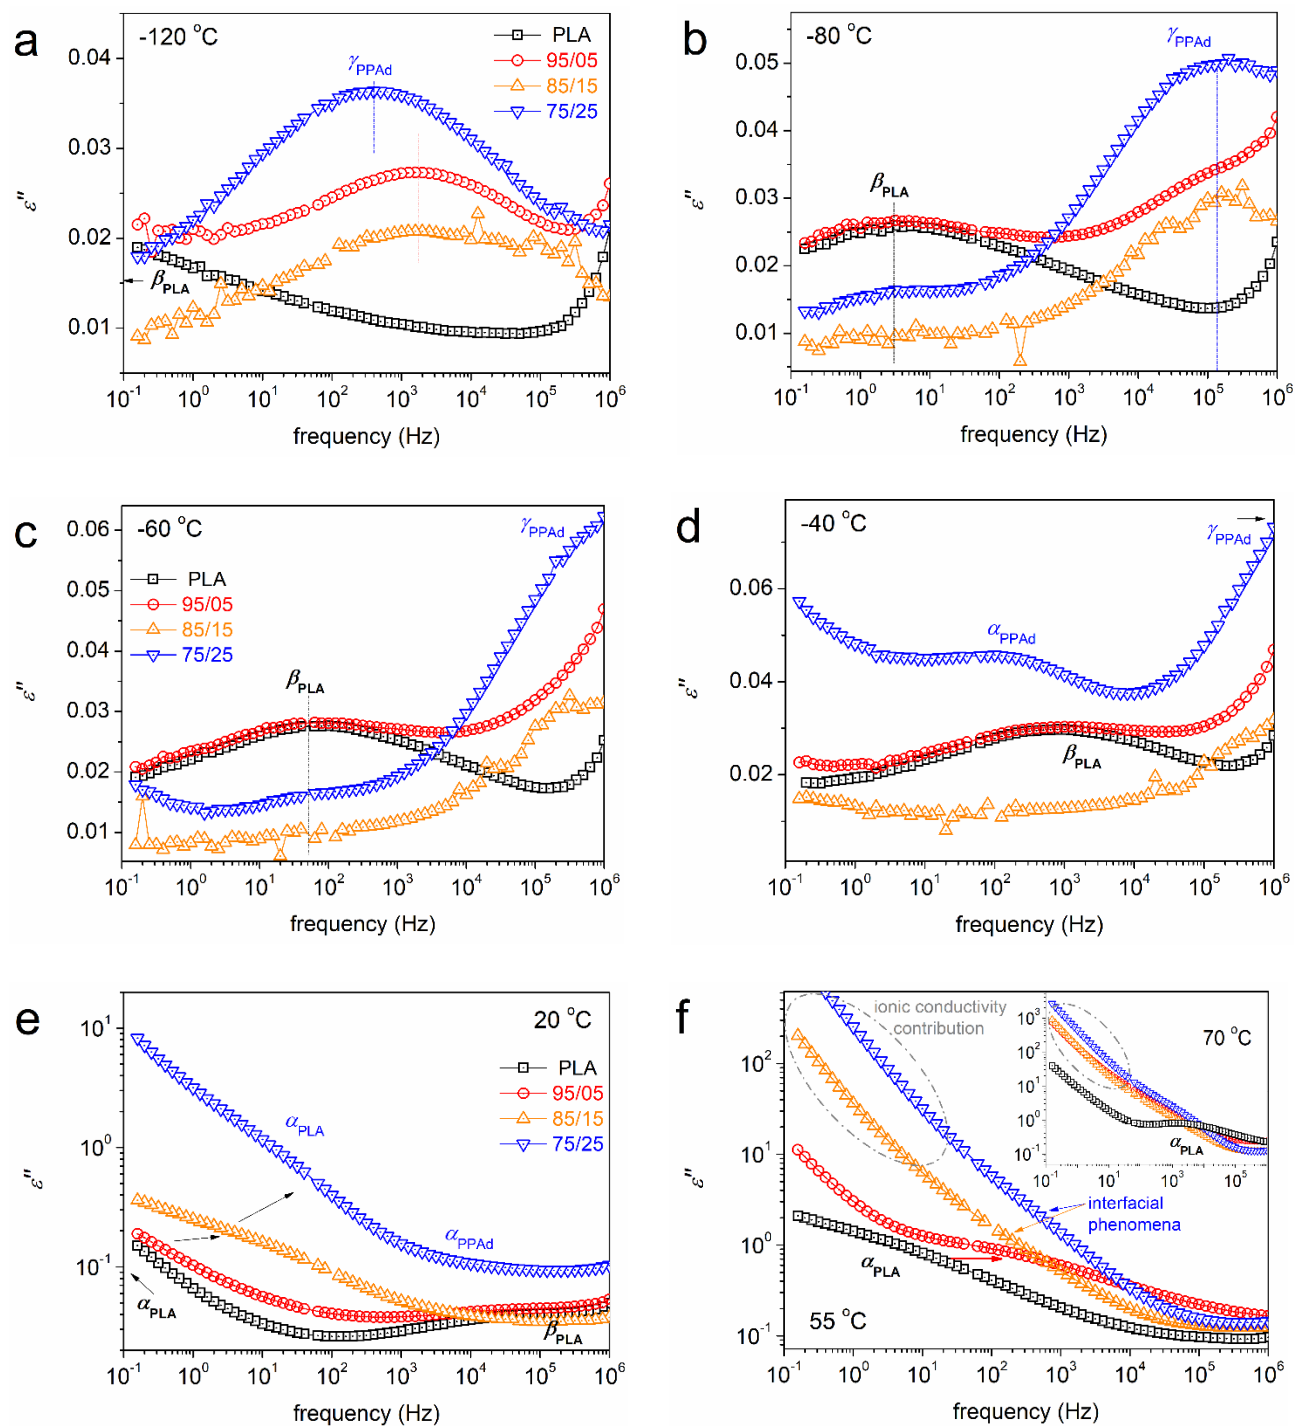

**Figure S4.** Comparative isothermal curves of  $\epsilon''$  for all compositions at various selected temperatures indicated on the plots.

The inset to (f) shows the isothermals of  $\epsilon''$  at the higher temperature of 70 °C, to point further on the ionic conductivity effects at the lower frequencies.
